# Supplementary material
Source: publisher figshare collection journal article supplement (https://acs.figshare.com/ndownloader/files/8483168)
Supplement: Supplementary file 1 [file 8483168]

## **Rapid Nano-gram scale screening method of micro-arrays to evaluate drug-polymer blends using high-throughput printing technology**

Vincenzo Taresco†, Iria Louzao†, David Scurr†, Jonathan Booth††, Kevin Treacher††, James McCabe††, Eleanor Turpin†, Charles A.

Laughton†, Cameron Alexander†, Jonathan C. Burley† and Martin C. Garnett†\*

**Table 1. Number of A and C values for each drug/polymer blend at all the w/w% ratios after 7 days.**

| <b>Drug</b>          | <b>Drug/PVPVA w/w%</b> |             |             |             |             | <b>AI%-7D</b> |
|----------------------|------------------------|-------------|-------------|-------------|-------------|---------------|
|                      | <b>5%</b>              | <b>10%</b>  | <b>15%</b>  | <b>25%</b>  | <b>50%</b>  |               |
| <b>Flutamide</b>     | <b>AAAA</b>            | <b>AAAA</b> | <b>AAAA</b> | <b>AAAA</b> | <b>AAAA</b> | <b>100</b>    |
| <b>Carbamazepine</b> | <b>AAAA</b>            | <b>AAAA</b> | <b>AAAA</b> | <b>AAAA</b> | <b>AAAC</b> | <b>95</b>     |
| <b>Flufenamic</b>    | <b>AAAA</b>            | <b>AAAA</b> | <b>AAAA</b> | <b>AAAA</b> | <b>AAAC</b> | <b>95</b>     |
| <b>Mefenamic</b>     | <b>AAAA</b>            | <b>AAAA</b> | <b>AAAA</b> | <b>AAAA</b> | <b>AACC</b> | <b>90</b>     |
| <b>Finasteride</b>   | <b>AAAA</b>            | <b>AAAA</b> | <b>AAAC</b> | <b>AACC</b> | <b>CCCC</b> | <b>60</b>     |
| <b>Caffeine</b>      | <b>AAAC</b>            | <b>AACC</b> | <b>AACC</b> | <b>CCCC</b> | <b>CCCC</b> | <b>35</b>     |

As depicted from the table, it is possible to evaluate the extent of amorphicity for each drug/polymer spot and easily calculate the AI% -7D average to determine differences of stable amorphous miscibility. The table was produced considering only spots formed for a volume between 60-70 nl.

## DAY 1

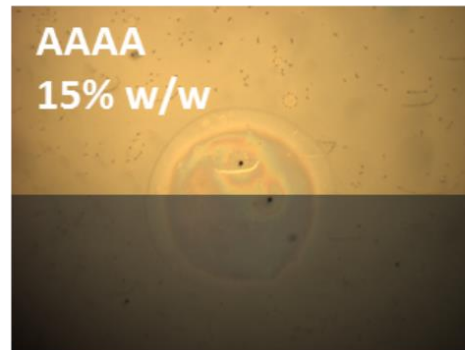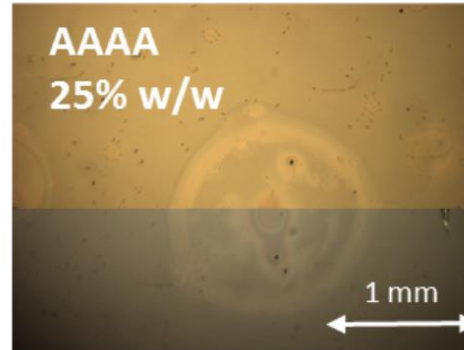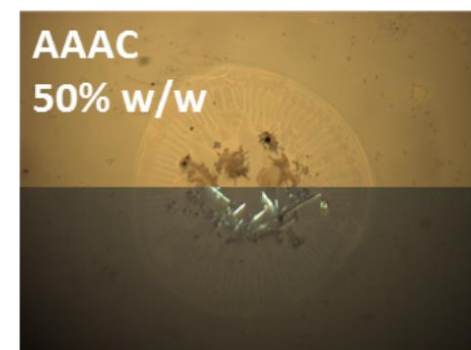

## DAY 7

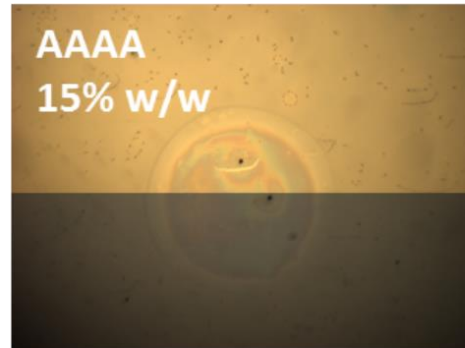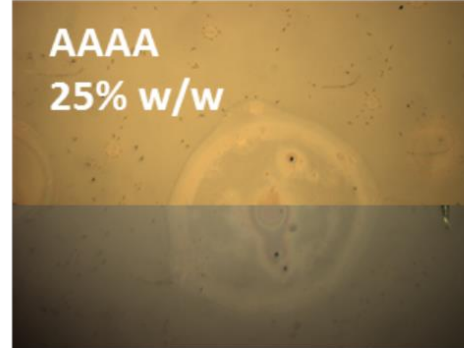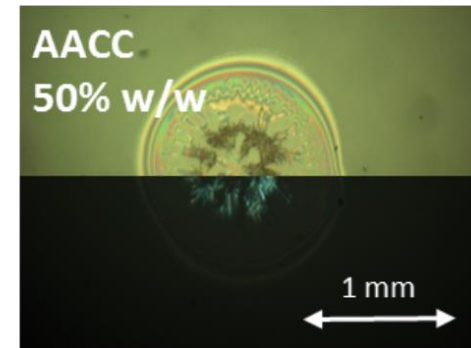

**Figure 1S1.** PVPVA/MEF blends at 15, 25 and 50% w/w ratios after 1day (top row) and 7 days (bottom row) were selected to show both an example of “A” degree due to polymer/drug ratios and the variation of AI% with time. Printed volume ranged from 62.5 to 70 nl (625-700 ng of final materials present on the slide).

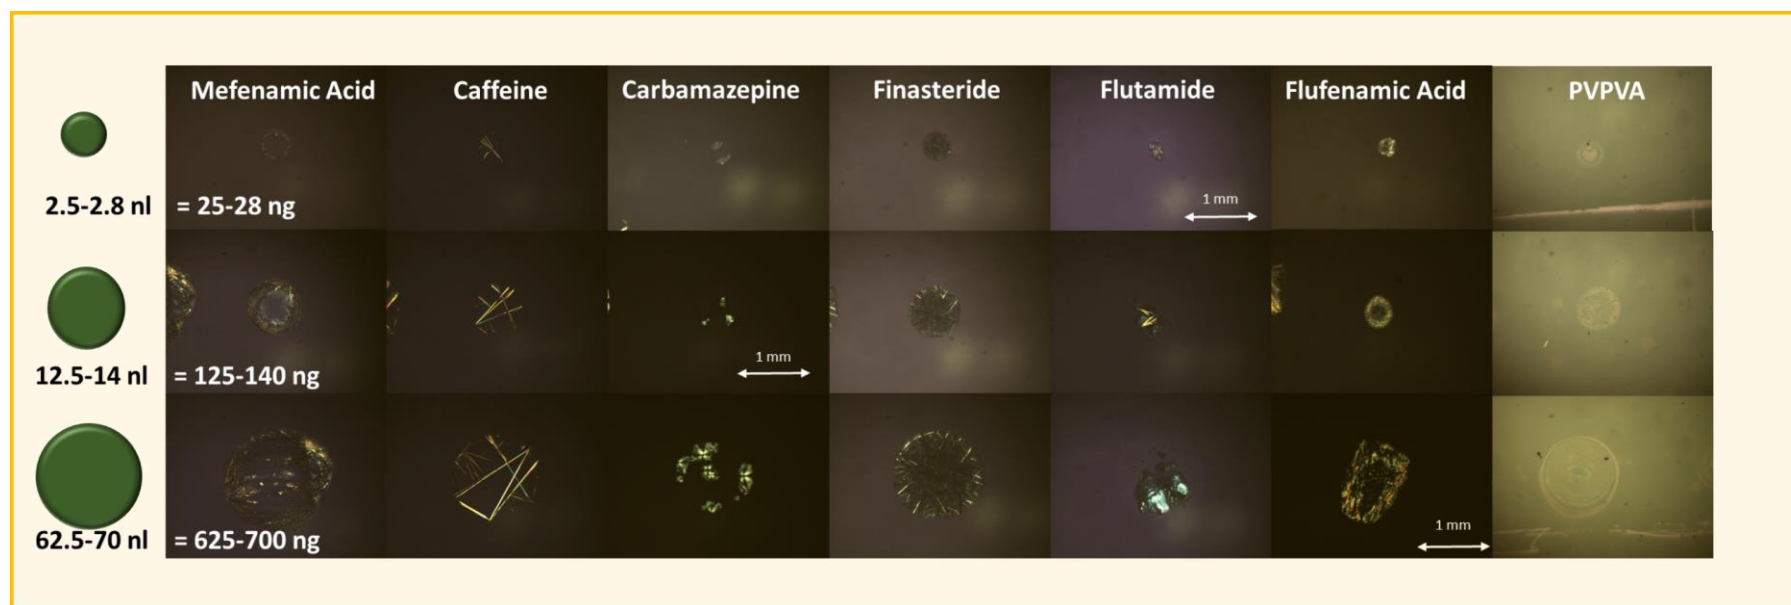

**Figure 2SI.** Pure drugs and PVPVA microarray depicted by POM with the polarizing filters on. From the top line: spots produced by depositing a volume solution between 2.5-2.8 nl (25-28 ng). Middle line: spots printed using 12.5-14 nl (125-140 ng). Bottom line: spots printed with a volume ranging 62.5-70 nl (625-700 ng). All the drugs but not the amorphous polymer show a characteristic birefringent pattern. In fact, PVPVA is barely visible with the polarizing filters on.

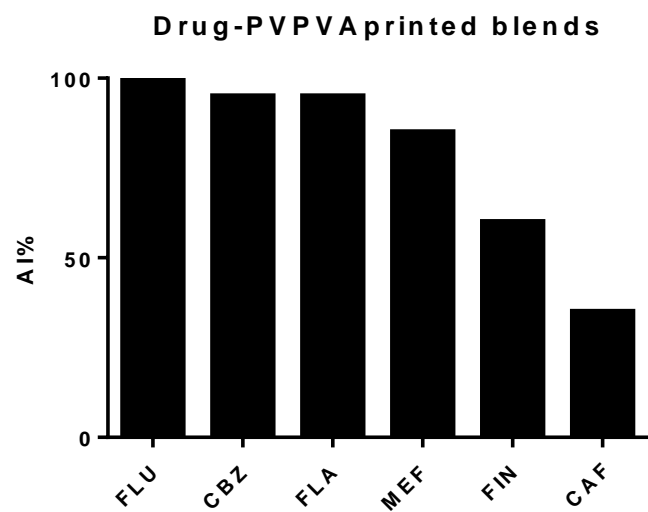

**Figure 3SI.** All the drugs showed an AI%-7D above 50% apart from CAF that re-crystallized easily at all the ratios with a final AI% of 35%.

FLU-PVPVA

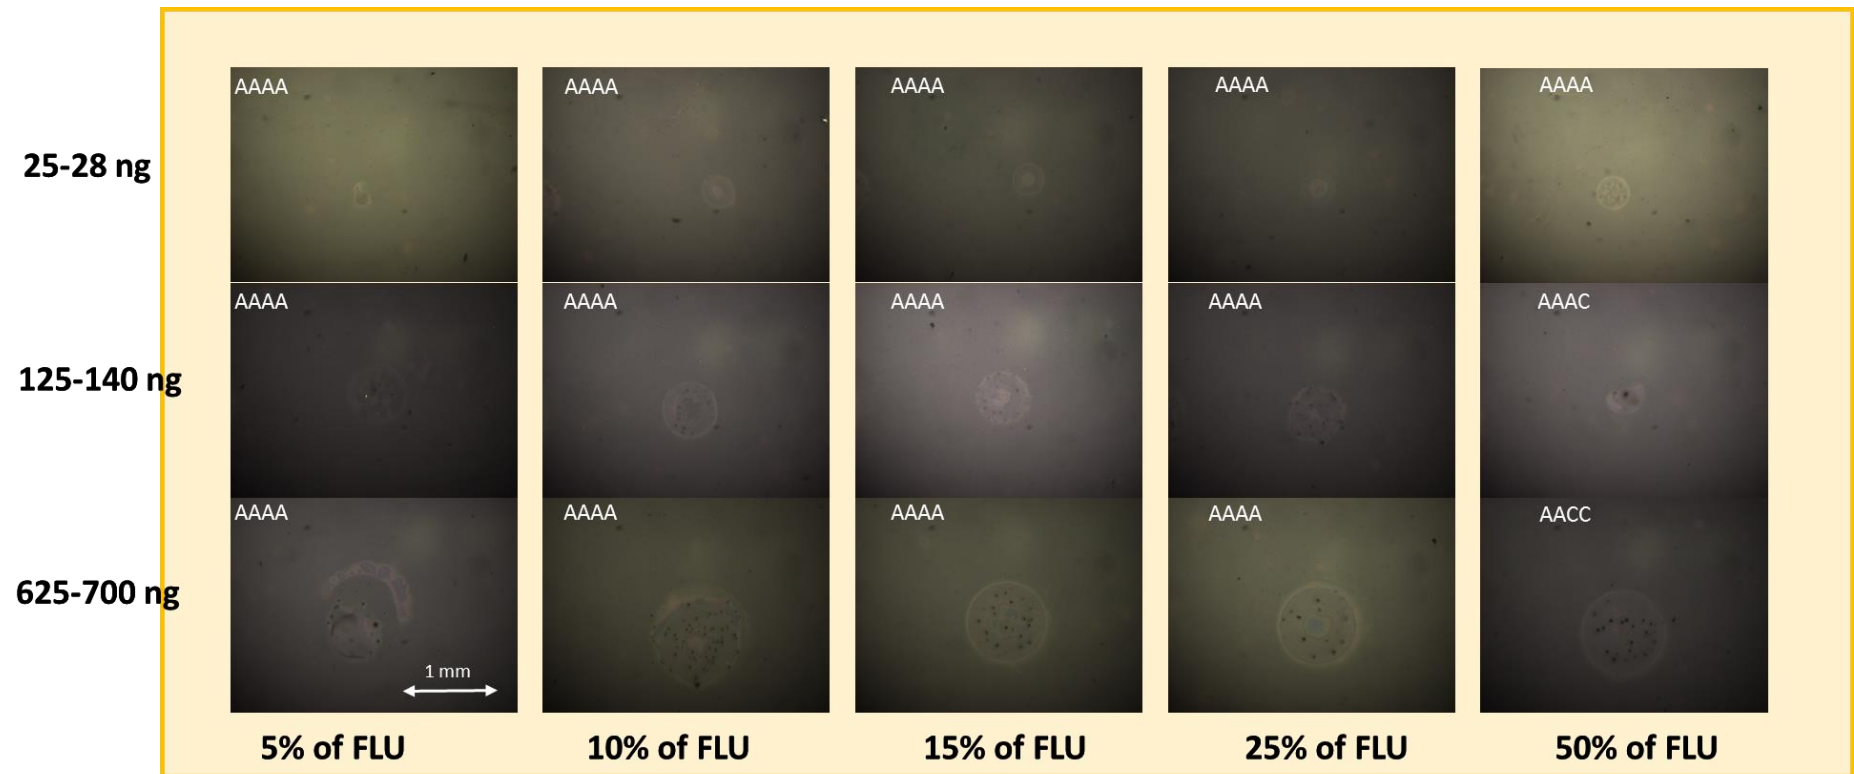

CBZ-PVPVA

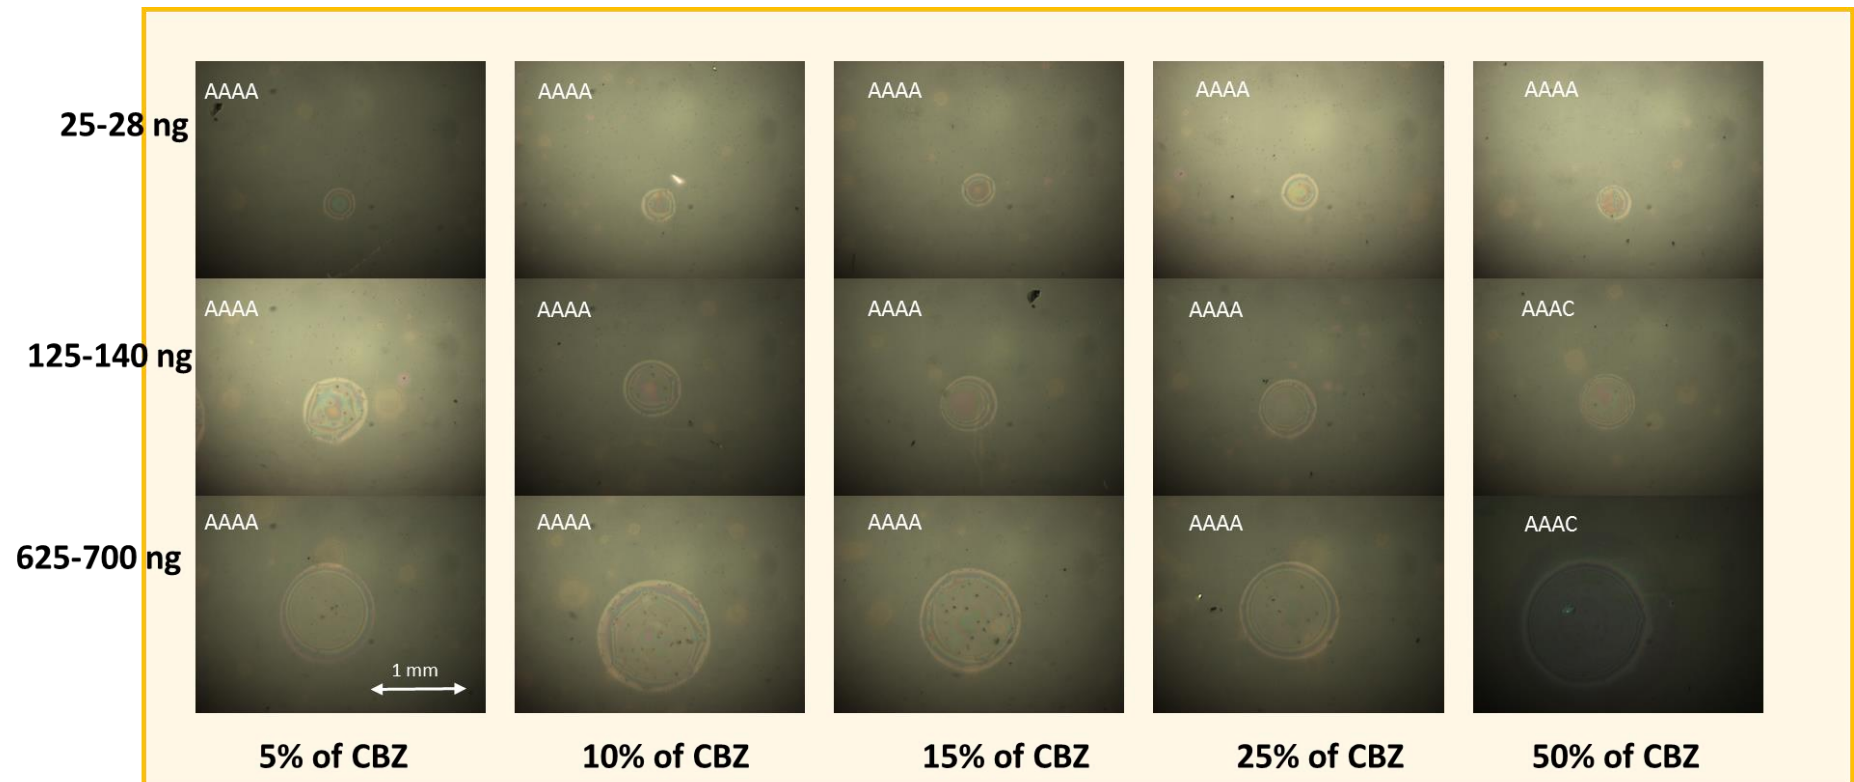

FLA-PVPVA

25-28 ng

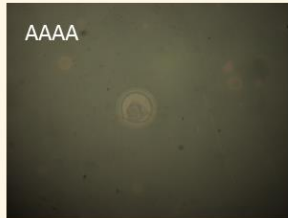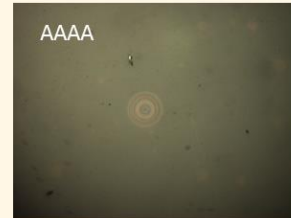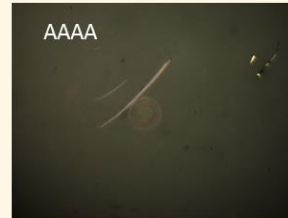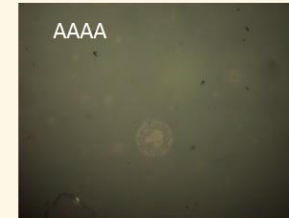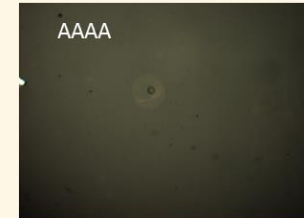

125-140 ng

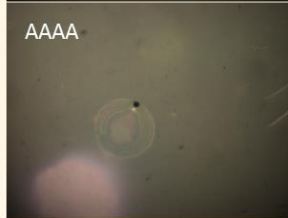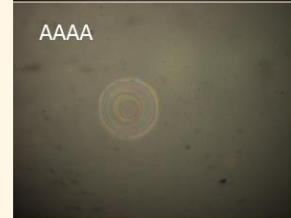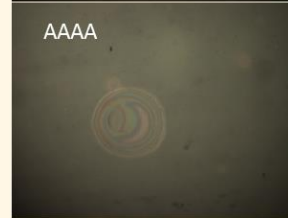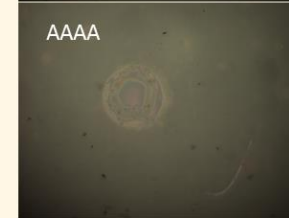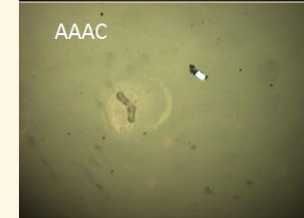

625-700 ng

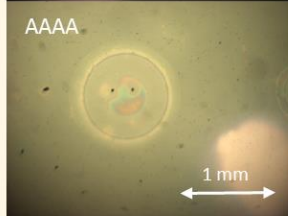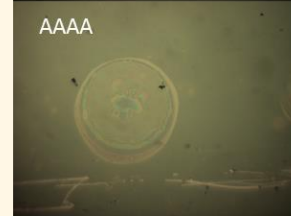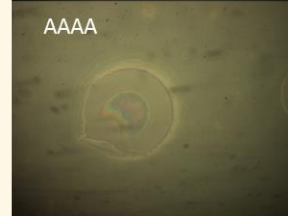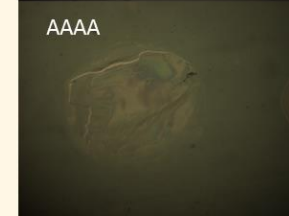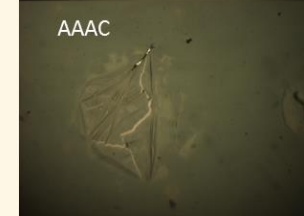

5% of FLA

10% of FLA

15% of FLA

25% of FLA

50% of FLA



MEF-PVPVA

25-28 ng

125-140 ng

625-700 ng

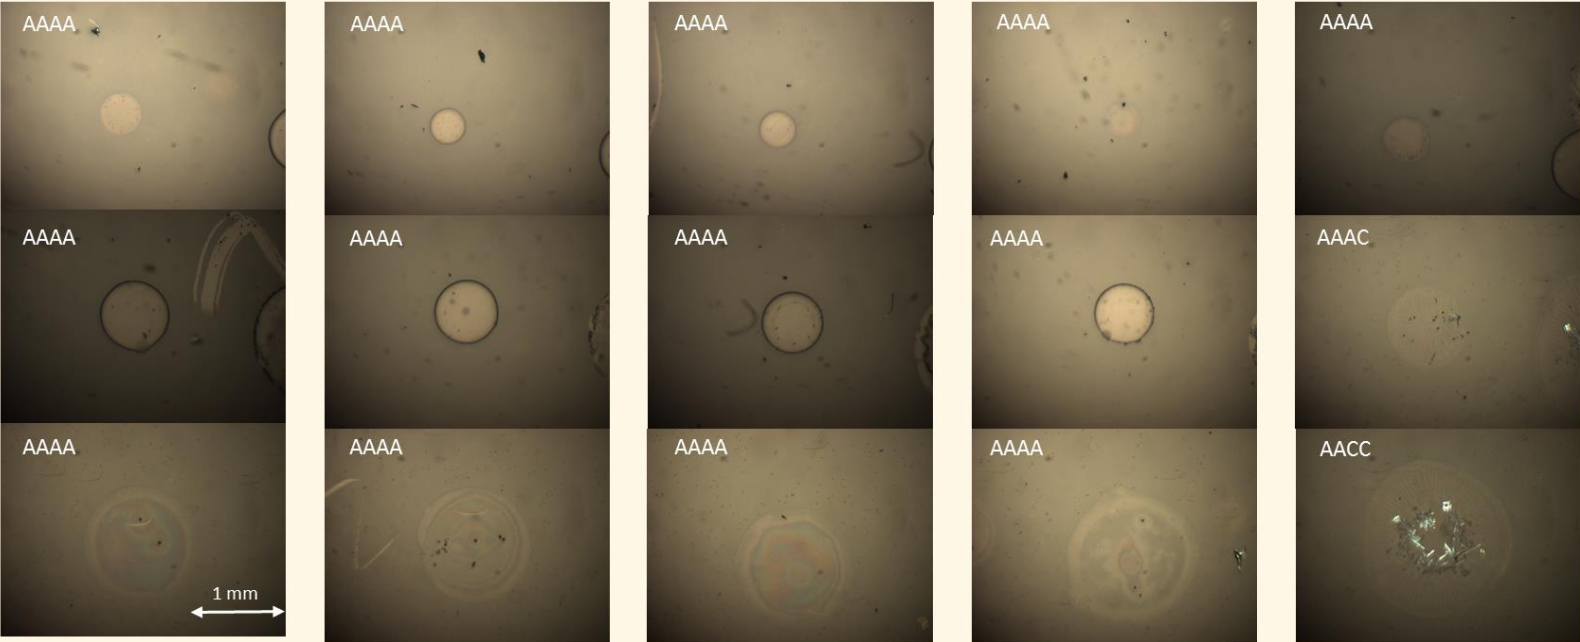

5% of MEF

10% of MEF

15% of MEF

25% of MEF

50% of MEF

CAF-PVPVA

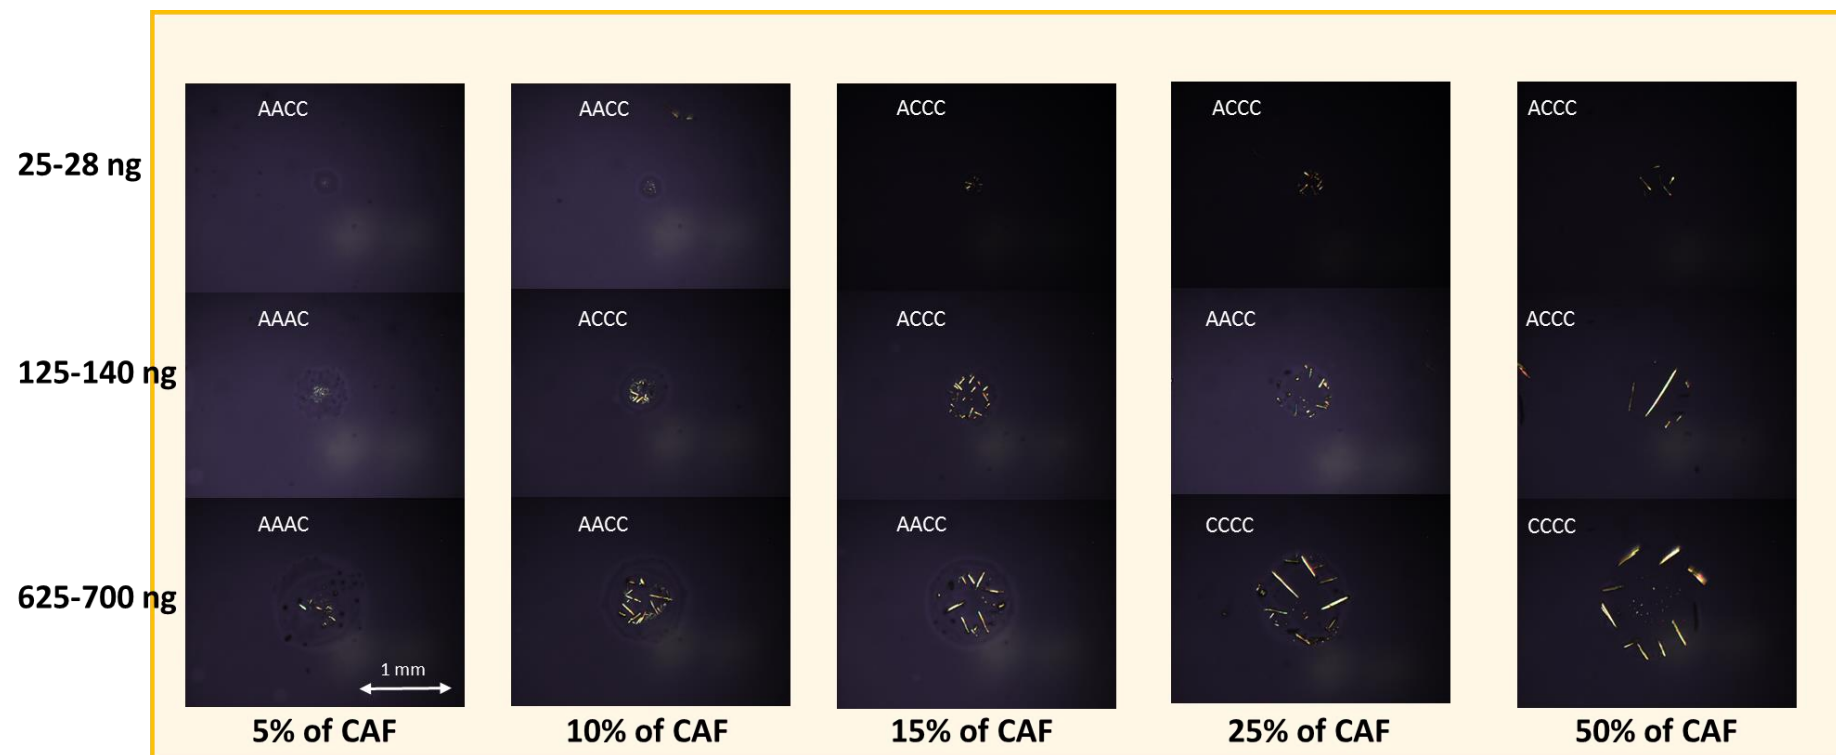

**Figure 4S1.** Drug-PVPVA spot array POM pictures, varying both printed amount (number of droplets) and drug polymer ratio.

Table 2SI. AI% of FLA against PAA, HPMC, PVPVA and PVP, at each w/w% ratio and as final average. The AI% for each drug\polymer formulation was calculated as an average between day 1 and 7.

|           | 10/90<br>AI%<br>1-7days | 25/75<br>AI%<br>1-7days | 40/60<br>AI%<br>1-7days | 50/50<br>AI%<br>1-7days | 60/40<br>AI%<br>1-7days | 75/25<br>AI%<br>1-7days | 90/10<br>AI%<br>1-7days | Average<br>AI% |
|-----------|-------------------------|-------------------------|-------------------------|-------------------------|-------------------------|-------------------------|-------------------------|----------------|
| FLA/PAA   | 25                      | 25                      | 0                       | 0                       | 0                       | 0                       | 0                       | 7              |
|           | 25                      | 25                      | 0                       | 0                       | 0                       | 0                       | 0                       | 7              |
| FLA/HPMC  | 100                     | 100                     | 100                     | 50                      | 25                      | 0                       | 0                       | 54             |
|           | 100                     | 100                     | 100                     | 100                     | 25                      | 0                       | 0                       | 61             |
| FLA/PVPVA | 100                     | 100                     | 100                     | 75                      | 50                      | 0                       | 0                       | 61             |
|           | 100                     | 100                     | 100                     | 100                     | 100                     | 63                      | 0                       | 80             |
| FLA/PVP   | 100                     | 100                     | 100                     | 100                     | 75                      | 25                      | 0                       | 71             |
|           | 100                     | 100                     | 100                     | 100                     | 100                     | 100                     | 0                       | 86             |

In the table both experimental (black) and literature (red) AI% values are reported. It is possible to exploit AI% to follow the presence of amorphicity stability trends amongst both polymers and between data generated by printing and literature results.
